# Supplementary material for: Topical Administration of a Soluble TNF Inhibitor Reduces Infarct Volume After Focal Cerebral Ischemia in Mice
Source: Front Neurosci. 2019 Aug 7;13:781. doi: 10.3389/fnins.2019.00781 (PMC6692878; doi:10.3389/fnins.2019.00781)
Supplement: Supplementary file 1 [file Data_Sheet_1.docx]

**Topical administration of a soluble TNF inhibitor reduces infarct volume after focal cerebral ischemia in mice**

Minna Yli-Karjanmaa†1, Bettina Hjelm Clausen†1,2, Matilda Degn3, Hans Gram Novrup1, Ditte Gry Ellman1, Peter Toft-Jensen1, David E. Szymkowski4, Allan Stensballe5, Morten Meyer1,2, Roberta Brambilla1,2,6, Kate Lykke Lambertsen*1,2,7

1Department of Neurobiology Research, Institute of Molecular Medicine, University of Southern Denmark, Odense, Denmark

2BRIDGE – Brain Research Inter-Disciplinary Guided Excellence, Department of Clinical Research, University of Southern Denmark, Odense, Denmark

3Pediatric Oncology Laboratory, Department of Pediatrics and Adolescent Medicine, University Hospital Rigshospitalet, Copenhagen, Denmark

4Xencor Inc, Monrovia, CA, USA

5Department of Health Science and Technology, University of Aalborg, Aalborg, Denmark

6The Miami Project to Cure Paralysis, University of Miami Miller School of Medicine, Miami, FL, USA

7Department of Neurology, Odense University Hospital, Odense, Denmark


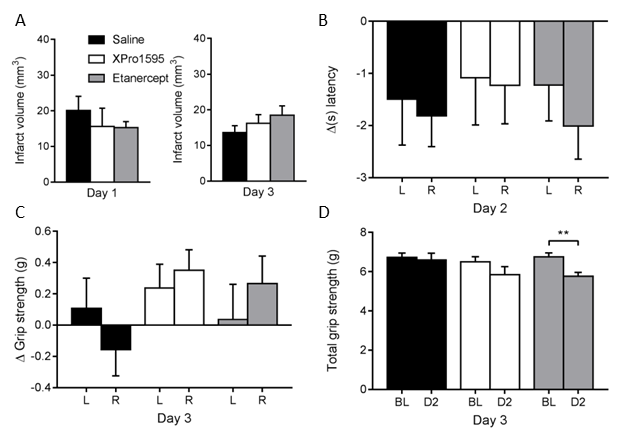


**Supplementary Figure 1. Infarct volume and functional outcome after i.c.v. administration**. **(A)** Infarct volume 1 and 3 days after i.c.v administration of TNF inhibitors n(day 1)= 3-5/group, n(day 3)=15-17/group. **(B)** Withdrawal latency after nociceptive stimuli measured by Hargreaves test two days after pMCAO; n=13-17/group. **(C)** Grip strength test of neuromuscular function measured as asymmetry between the right and left side three days after pMCAO; n=16-18/group. **(D)** Grip strength test of neuromuscular function measured as total grip strength of both paws three days after pMCAO; n=16-17/group. **p≤0.01, Student’s paired t-test.


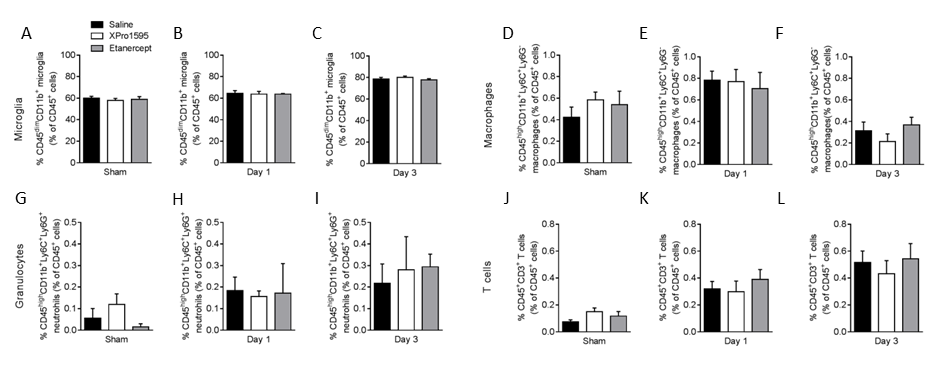


**Supplementary Figure 2. Flow cytometric analysis of contralateral hemispheres in sham and pMCAO mice after topical saline, XPro1595, or etanercept treatment. (A-C)** Changes in CD45dimCD11b+ microglia presented as % of CD45+ cells after sham surgery or 1 or 3 days after pMCAO. **(D-F)** Changes in CD45highCD11b+Ly6C+Ly6G- macrophages presented as % of CD45+ cells after sham surgery or 1 or 3 days after pMCAO. **(G-I)** Changes in CD45highCD11b+Ly6C+Ly6G+ granulocytes presented as % of CD45+ cells after sham surgery or 1 or 3 days after pMCAO. **(J-L)** Changes in CD3+ T cells presented as % of CD45+ cells after sham surgery or 1 or 3 days after pMCAO. n(sham)=4-5/group; n(day 1)=4-5/group; n(day 3)=5/group.


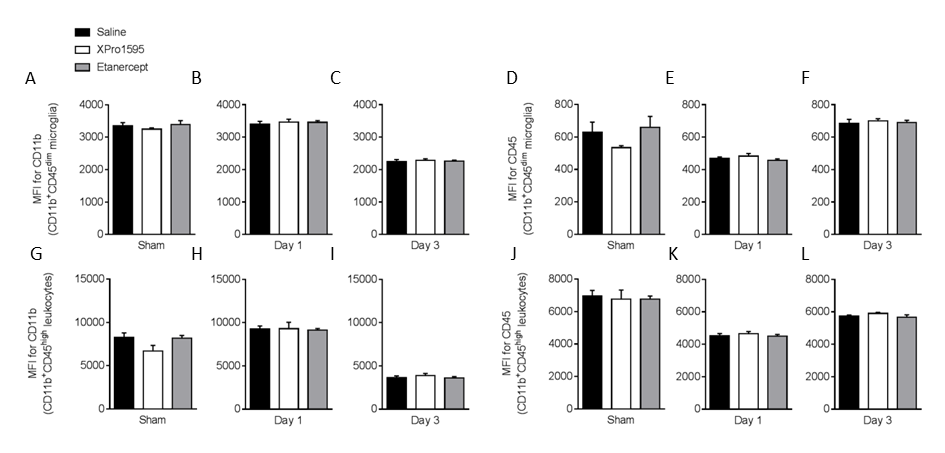


**Supplementary Figure 3. Mean fluorescence intensity (MFI) of CD11b and CD45 in the ipsilateral cortex of mice treated topically with saline, XPro1595, or etanercept. (A-C)** MFI for CD11b of CD11b+CD45dim microglia after sham surgery or 1 or 3 days after pMCAO. **(D-F)** MFI for CD45 of CD11b+CD45dim microglia after sham surgery or 1 or 3 days after pMCAO. **(G-I)** MFI for CD11b of CD11b+CD45high leukocytes after sham surgery or 1 or 3 days after pMCAO. **(J-L)** MFI for CD45 of CD11b+CD45high leukocytes after sham surgery or 1 or 3 days after pMCAO. N(sham)=4-5/group; n(day 1)=4-5/group; n(day 3)=5/group.


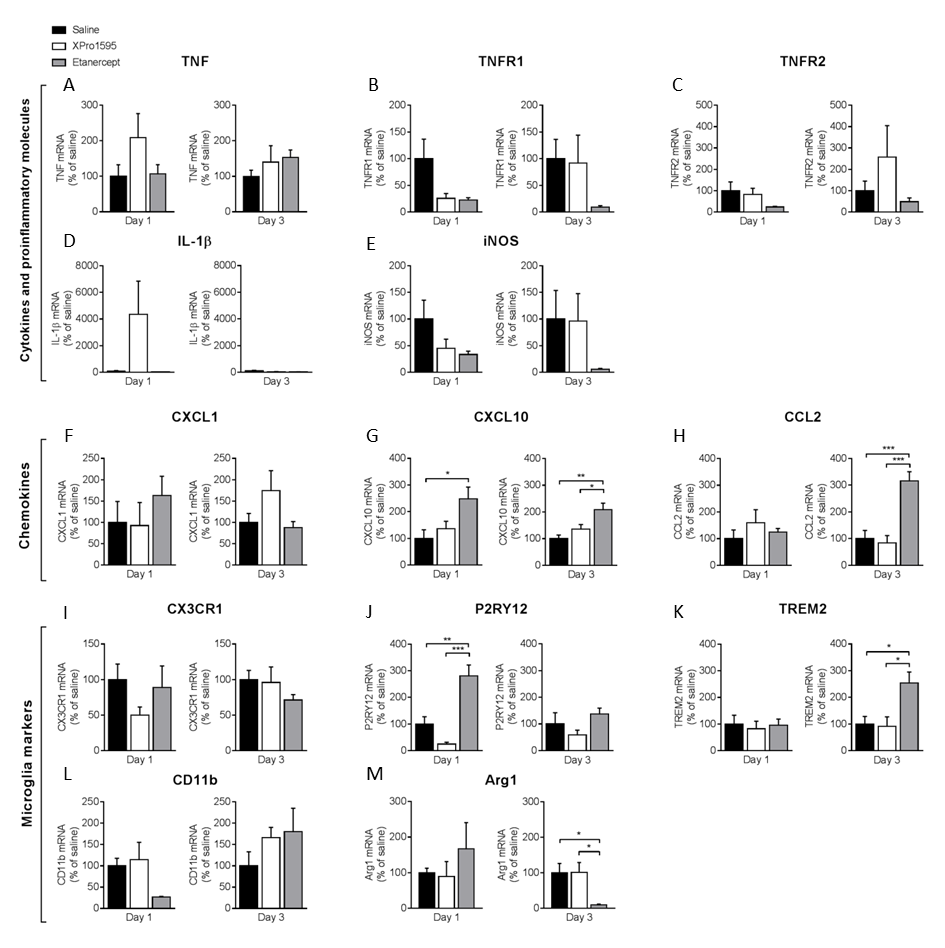


**Supplementary Figure 4. Inflammatory gene profile 1 and 3 days after pMCAO in mice treated i.c.v. with saline, XPro1595, or saline.** mRNA expression of cytokines, pro-inflammatory molecules, chemokines, and microglial markers presented as % of gene expression in saline-treated animals **(A-M). (A)** Expression of *Tnf* mRNA. **(B)** Expression of *Tnfrsf1a* (TNFR1) mRNA. **(C)** Expression of *Tnfrsf1b* (TNFR2) mRNA. **(D)** Expression of *Il1β* mRNA. **(E)** Expression of *iNOS* mRNA. **(F)** Expression of *Cxcl1* mRNA. **(G)** Expression of *Cxcl10* mRNA. **(H)** Expression of *Ccl2* mRNA. **(I)** Expression of *Cx3cr1* mRNA. **(J)** Expression of *P2ry12* mRNA. **(K)** Expression of *Trem2* mRNA. **(L)** Expression of *Cd11b* mRNA. **(M)** Expression of *Arg1* mRNA. N(day 1)=3-5/group, n(day 3)=4-6/group;*p≤0.05, **p≤0.01, ***p≤0.001; one-way ANOVA followed by Tukey’s *post hoc* test.


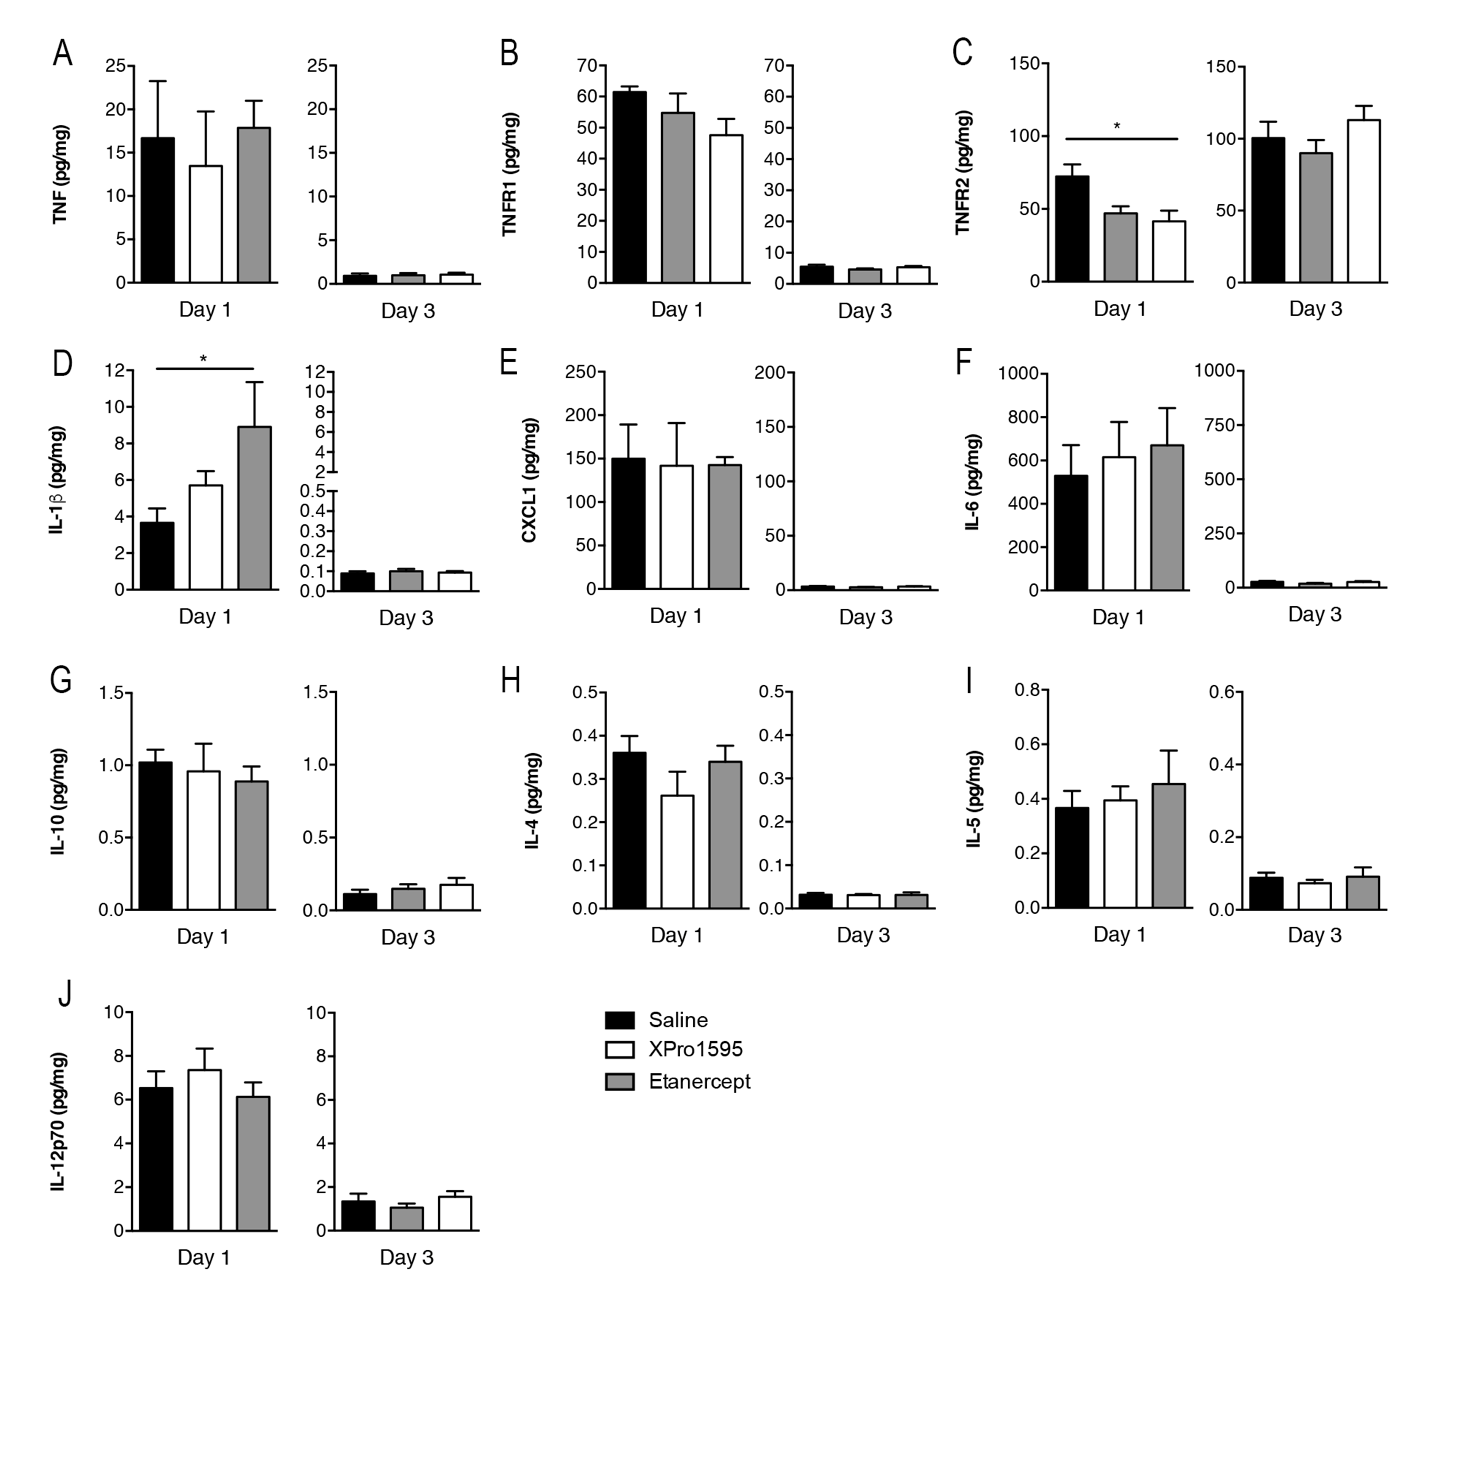


**Supplementary Figure 5. Cytokine and receptor protein expression in brain tissue 1 and 3 days after pMCAO in mice treated i.c.v. with saline, XPro1595, or etanercept. (A)** Expression of TNF. **(B)** Expression of TNFR1. **(C)** Expression of TNFR2. **(D)** Expression of IL-1β. **(E)** Expression of Cxcl1. **(F)** Expression of IL-6. **(G)** Expression of IL-10. **(H)** Expression of IL-4. **(I)** Expression of IL-5. **(J)** Expression of IL-12p70. N=3-6/group, **p≤0.01; one-way ANOVA with Tukey’s *post hoc* test.


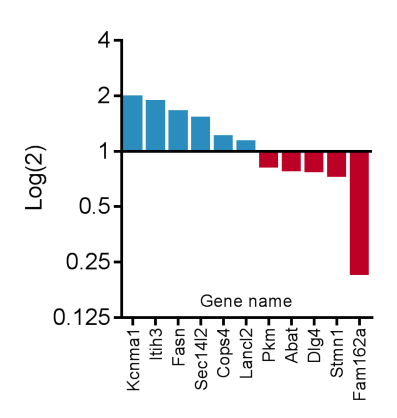


**Supplementary Figure 6. Proteomics of neurons from tmTNFΔ/Δ and tmTNFwt/wt mice.** Up- and downregulated proteins in neurons from tmTNFΔ/Δ and tmTNFwt/wt mice. N(tmTNFwt/wt)= 4, n(tmTNFΔ/Δ)= 6.
